# Supplementary material for: Characterization of a novel wood mouse virus related to murid herpesvirus 4
Source: PubMed Central journal article supplement (PMC2888160; doi:10.1099/vir.0.017327-0), 2010-04
Supplement: supp_91_4_867__1.pdf [file supp_91_4_867__1.pdf]

**Supplementary Table S1.** Information used to annotate the WMHV and MuHV4 genome sequences

 Encoded by a core gene (i.e. inherited from an ancestor of alpha-, beta- and gammaherpesviruses);

 Encoded by a betagamma gene (i.e. inherited from an ancestor of beta- and gammaherpesviruses);

 Encoded by a gamma gene (i.e. inherited from an ancestor of gammaherpesviruses);

 Encoded by a gene specific to a subset of gammaherpesviruses.

| Gene           | Protein name*                       | Family | Description                                                                                    | EC no.  | Activity                                  |
|----------------|-------------------------------------|--------|------------------------------------------------------------------------------------------------|---------|-------------------------------------------|
| <i>M1</i>      | Protein M1                          | M1     | Contains a signal peptide; secreted protein                                                    |         | Unknown                                   |
| <i>M2</i>      | Protein M2                          |        | Interacts with Vav oncoprotein; involved in B-cell proliferation and differentiation           |         | Immune regulation; latency                |
| <i>M3</i>      | Chemokine-binding protein M3        | M1     | Contains a signal peptide; secreted protein                                                    |         | Immune regulation                         |
| <i>M4</i>      | Chemokine-binding protein M4        | M1     | Contains a signal peptide; secreted protein                                                    |         | Immune regulation                         |
| <i>ORF4</i>    | Complement control protein          | CCP    | Type 1 envelope glycoprotein; contains four SCR domains                                        |         | Immune regulation                         |
| <i>ORF6</i>    | Single-stranded DNA-binding protein |        | Contains a zinc finger                                                                         |         | DNA replication; possibly gene regulation |
| <i>ORF7</i>    | DNA packaging terminase subunit 2   |        |                                                                                                |         | DNA encapsidation                         |
| <i>ORF8</i>    | Envelope glycoprotein B             |        | Type 1 membrane protein; possible membrane fusogen; binds cell-surface heparan sulphate        |         | Cell entry; cell-to-cell spread           |
| <i>ORF9</i>    | DNA polymerase catalytic subunit    |        |                                                                                                | 2.7.7.7 | DNA replication                           |
| <i>ORF10</i>   | Protein G10                         | DURP   |                                                                                                |         | Unknown                                   |
| <i>ORF11</i>   | Virion protein G11                  | DURP   |                                                                                                |         | Unknown                                   |
| <i>ORF12</i>   | E3 ubiquitin ligase MIR1            | MIR    | Type 3 membrane protein; two transmembrane domains; contains a PHD finger; downregulates MHC I |         | Immune regulation                         |
| <i>13M</i>     | Protein 13M                         |        | Hypothetical protein encoded by 5'-region of ORF12 transcript                                  |         | Unknown                                   |
| <i>ORF17.5</i> | Capsid scaffold protein             |        | Clipped near C terminus                                                                        |         | Capsid morphogenesis                      |

Hughes, D. J., Kipar, A., Milligan, S. G., Cunningham, C., Sanders, M., Quail, M. A., Rajandream, M.-A., Efstathiou, S., Bowden, R. J., Chastel, C., Bennett, M., Sample, J. T., Barrell, B., Davison, A. J. & Stewart, J. P. (2010). Characterization of a novel wood mouse virus related to murid herpesvirus 4. *J Gen Virol* 91, 867–879.

| Gene  | Protein name*                            | Family | Description                                                                                                 | EC no.    | Activity                              |
|-------|------------------------------------------|--------|-------------------------------------------------------------------------------------------------------------|-----------|---------------------------------------|
| ORF17 | Capsid maturation protease               |        | Serine protease (N-terminal region); minor scaffold protein (remainder of protein, clipped near C terminus) | 3.4.21.97 | Capsid morphogenesis                  |
| ORF18 | Protein UL79                             |        | Required for expression of late genes                                                                       |           | Gene regulation                       |
| ORF19 | DNA packaging tegument protein UL25      |        | Located on capsid near vertices; possibly stabilizes the capsid and retains the genome                      |           | DNA encapsidation                     |
| ORF20 | Nuclear protein UL24                     |        |                                                                                                             |           | Unknown                               |
| ORF21 | Thymidine kinase                         |        |                                                                                                             | 2.7.1.21  | Nucleotide metabolism                 |
| ORF22 | Envelope glycoprotein H                  |        | Type 1 membrane protein; possible membrane fusogen; complexed with envelope glycoprotein L                  |           | Cell entry; cell-to-cell spread       |
| ORF23 | Protein UL88                             |        |                                                                                                             |           | Unknown                               |
| ORF24 | Virion protein UL87                      |        |                                                                                                             |           | Unknown                               |
| ORF25 | Major capsid protein                     |        | Six copies form hexons, five copies form pentons                                                            |           | Capsid morphogenesis                  |
| ORF26 | Capsid triplex subunit 2                 |        | Complexed 2 : 1 with capsid triplex subunit 1 to connect capsid hexons and pentons                          |           | Capsid morphogenesis                  |
| ORF27 | Envelope glycoprotein 48                 |        | Type 2 membrane protein                                                                                     |           | Cell-to-cell spread                   |
| ORF28 | Envelope glycoprotein 150                |        | Type 1 membrane protein                                                                                     |           | Immune regulation                     |
| ORF29 | DNA packaging terminase subunit 1        |        | Contains an ATPase domain                                                                                   |           | DNA encapsidation                     |
| ORF30 | Protein UL91                             |        |                                                                                                             |           | Unknown                               |
| ORF31 | Protein UL92                             |        |                                                                                                             |           | Unknown                               |
| ORF32 | DNA packaging tegument protein UL17      |        | Capsid-associated                                                                                           |           | DNA encapsidation; capsid transport   |
| ORF33 | Tegument protein UL16                    |        |                                                                                                             |           | Possibly virion morphogenesis         |
| ORF34 | Protein UL95                             |        |                                                                                                             |           | Unknown                               |
| ORF35 | Tegument protein UL14                    |        |                                                                                                             |           | Virion morphogenesis                  |
| ORF36 | Tegument serine/threonine protein kinase | PK     |                                                                                                             | 2.7.11.1  | Protein phosphorylation               |
| ORF37 | Deoxyribonuclease                        |        |                                                                                                             |           | DNA processing                        |
| ORF38 | Myristylated tegument protein            |        | Envelope-associated                                                                                         |           | Virion morphogenesis                  |
| ORF39 | Envelope glycoprotein M                  |        | Type 3 membrane protein; eight transmembrane domains; complexed with envelope glycoprotein N                |           | Virion morphogenesis; membrane fusion |
| ORF40 | Helicase-primase subunit                 |        |                                                                                                             |           | DNA replication                       |
| ORF42 | Tegument protein UL7                     |        |                                                                                                             |           | Virion morphogenesis                  |

Hughes, D. J., Kipar, A., Milligan, S. G., Cunningham, C., Sanders, M., Quail, M. A., Rajandream, M.-A., Efstathiou, S., Bowden, R. J., Chastel, C., Bennett, M., Sample, J. T., Barrell, B., Davison, A. J. & Stewart, J. P. (2010). Characterization of a novel wood mouse virus related to murid herpesvirus 4. *J Gen Virol* 91, 867–879.

| Gene  | Protein name*                        | Family | Description                                                                                                                                                          | EC no.   | Activity                                      |
|-------|--------------------------------------|--------|----------------------------------------------------------------------------------------------------------------------------------------------------------------------|----------|-----------------------------------------------|
| ORF43 | Capsid portal protein                |        | Dodecamer located at one capsid vertex in place of a penton                                                                                                          |          | DNA encapsidation                             |
| ORF44 | Helicase–primase helicase subunit    |        |                                                                                                                                                                      |          | DNA replication                               |
| ORF45 | Tegument protein G45                 |        |                                                                                                                                                                      |          | Unknown                                       |
| ORF46 | Uracil-DNA glycosylase               |        |                                                                                                                                                                      | 3.2.2.3  | DNA repair                                    |
| ORF47 | Envelope glycoprotein L              |        | Complexed with envelope glycoprotein H                                                                                                                               |          | Cell entry; cell-to-cell spread               |
| ORF48 | Tegument protein G48                 |        |                                                                                                                                                                      |          | Unknown                                       |
| ORF49 | Protein G49                          |        | Cooperates with protein Rta                                                                                                                                          |          | Gene regulation                               |
| ORF50 | Protein Rta                          |        |                                                                                                                                                                      |          | Gene regulation; latency                      |
| ORF51 | Envelope glycoprotein 350            |        | Type 1 membrane protein                                                                                                                                              |          | Cell attachment                               |
| ORF52 | Virion protein G52                   |        |                                                                                                                                                                      |          | Unknown                                       |
| ORF53 | Envelope glycoprotein N              |        | Type 1 membrane protein; complexed with envelope glycoprotein M                                                                                                      |          | Virion morphogenesis; membrane fusion         |
| ORF54 | Deoxyuridine triphosphatase          | DURP   |                                                                                                                                                                      | 3.6.1.23 | Nucleotide metabolism                         |
| ORF55 | Tegument protein UL51                |        |                                                                                                                                                                      |          | Virion morphogenesis                          |
| ORF56 | Helicase–primase primase subunit     |        |                                                                                                                                                                      |          | DNA replication                               |
| ORF57 | Multifunctional expression regulator | MER    | RNA-binding protein; shuttles between nucleus and cytoplasm; inhibits pre-mRNA splicing; exports virus mRNA from nucleus; exerts most effects post-transcriptionally |          | Gene regulation; RNA metabolism and transport |
| ORF58 | Envelope protein UL43                |        | Type 3 membrane protein; 11 transmembrane domains                                                                                                                    |          | Possibly membrane fusion                      |
| ORF59 | DNA polymerase processivity subunit  |        | dsDNA-binding protein                                                                                                                                                |          | DNA replication                               |
| ORF60 | Ribonucleotide reductase subunit 2   |        |                                                                                                                                                                      | 1.17.4.1 | Nucleotide metabolism                         |
| ORF61 | Ribonucleotide reductase subunit 1   |        |                                                                                                                                                                      | 1.17.4.1 | Nucleotide metabolism                         |
| ORF62 | Capsid triplex subunit 1             |        | Complexed 1 : 2 with capsid triplex subunit 2 to connect capsid hexons and pentons                                                                                   |          | Capsid morphogenesis                          |
| ORF63 | Tegument protein UL37                |        | Complexed with large tegument protein                                                                                                                                |          | Virion morphogenesis                          |
| ORF64 | Large tegument protein               |        | Complexed with tegument protein UL37; ubiquitin-specific protease (N-terminal region)                                                                                |          | Capsid transport                              |

Hughes, D. J., Kipar, A., Milligan, S. G., Cunningham, C., Sanders, M., Quail, M. A., Rajandream, M.-A., Efstathiou, S., Bowden, R. J., Chastel, C., Bennett, M., Sample, J. T., Barrell, B., Davison, A. J. & Stewart, J. P. (2010). Characterization of a novel wood mouse virus related to murid herpesvirus 4. *J Gen Virol* 91, 867–879.

| Gene   | Protein name*                          | Family | Description                                           | EC no. | Activity                                        |
|--------|----------------------------------------|--------|-------------------------------------------------------|--------|-------------------------------------------------|
| ORF65  | Small capsid protein                   |        | Located externally on capsid hexons                   |        | Capsid morphogenesis; possibly capsid transport |
| ORF66  | Protein UL49                           |        |                                                       |        | Unknown                                         |
| ORF67  | Nuclear egress type 2 Membrane protein |        | Interacts with nuclear egress lamina protein          |        | Nuclear egress                                  |
| ORF67A | DNA-packaging protein UL33             |        | Interacts with DNA packaging terminase subunit 2      |        | DNA encapsidation                               |
| ORF68  | DNA-packaging protein UL32             |        |                                                       |        | DNA encapsidation; possibly capsid transport    |
| ORF69  | Nuclear egress lamina protein          |        | Interacts with nuclear egress type 2 membrane protein |        | Nuclear egress                                  |
| ORF72  | Cyclin                                 |        |                                                       |        | Cell cycle regulation                           |
| M11    | Apoptosis regulator M11                | Bcl-2  |                                                       |        | Apoptosis                                       |
| ORF73  | Nuclear antigen LANA                   |        | Chromosome-tethering protein                          |        | Latency                                         |
| ORF74  | Membrane protein G74                   | GPCR   | Type 3 membrane protein; seven transmembrane domains  |        | Intracellular signalling                        |
| ORF75C | Tegument protein G75C                  | FGARAT |                                                       |        | Unknown                                         |
| ORF75B | Protein G75B                           | FGARAT |                                                       |        | Unknown                                         |
| ORF75A | Protein G75A                           | FGARAT |                                                       |        | Unknown                                         |

\*Protein names are a provisional standard for all herpesviruses.
